# Supplementary material for: Changes in admission thresholds in English emergency departments
Source: PubMed Central journal article supplement — Emerg Med J. 2017 Sep 12;34(12):773–9. doi: 10.1136/emermed-2016-206213 (PMC5750365; doi:10.1136/emermed-2016-206213), 2017-09-12
Supplement: emermed-2016-206213supp001.pdf [file emermed-2016-206213supp001.pdf]

## **Appendix A – NHS Organisations Included in the Study**

Airedale NHS Foundation Trust  
Alder Hey Children's NHS Foundation Trust  
Ashford and St Peter's Hospitals NHS Foundation Trust  
Birmingham Children's Hospital NHS Foundation Trust  
Bolton NHS Foundation Trust  
Burton Hospitals NHS Foundation Trust  
Colchester Hospital University NHS Foundation Trust  
Countess of Chester Hospital NHS Foundation Trust  
Doncaster and Bassetlaw Hospitals NHS Foundation Trust  
Dorset County Hospital NHS Foundation Trust  
East Cheshire NHS Trust  
East Lancashire Hospitals NHS Trust  
East Sussex Healthcare NHS Trust  
Frimley Park Hospital NHS Foundation Trust  
Gateshead Health NHS Foundation Trust  
George Eliot Hospital NHS Trust  
Gloucestershire Hospitals NHS Foundation Trust  
Hinchingbrooke Health Care NHS Trust  
Kettering General Hospital NHS Foundation Trust  
Lancashire Teaching Hospitals NHS Foundation Trust  
Liverpool Women's NHS Foundation Trust  
Luton and Dunstable University Hospital NHS Foundation Trust  
Maidstone and Tunbridge Wells NHS Trust  
Mid Cheshire Hospitals NHS Foundation Trust  
Mid Staffordshire NHS Foundation Trust  
Mid Yorkshire Hospitals NHS Trust  
North Tees and Hartlepool NHS Foundation Trust  
Northern Lincolnshire and Goole NHS Foundation Trust  
Northumbria Healthcare NHS Foundation Trust  
Nottingham University Hospitals NHS Trust  
Pennine Acute Hospitals NHS Trust  
Peterborough and Stamford Hospitals NHS Foundation Trust  
Portsmouth Hospitals NHS Trust  
Salisbury NHS Foundation Trust  
Sheffield Teaching Hospitals NHS Foundation Trust  
South Devon Healthcare NHS Foundation Trust  
South Tees Hospitals NHS Foundation Trust  
South Warwickshire NHS Foundation Trust  
Southend University Hospital NHS Foundation Trust  
St Helens and Knowsley Hospitals NHS Trust  
The Queen Elizabeth Hospital King's Lynn NHS Foundation Trust  
University College London Hospitals NHS Foundation Trust  
University Hospital Southampton NHS Foundation Trust  
University Hospitals of Morecambe Bay NHS Foundation Trust  
West Suffolk NHS Foundation Trust  
Western Sussex Hospitals NHS Foundation Trust  
York Teaching Hospital NHS Foundation Trust

**Table A1 - Comparison of Hospital Trusts in this Study with all Hospital Trusts with Type 1 or 2 Emergency Departments**

|                                           | <b>Study Trusts<br/>(n=47)</b> | <b>All Trusts with Type 1, 2 EDs<br/>(n=145)</b> |
|-------------------------------------------|--------------------------------|--------------------------------------------------|
| <b>Region</b>                             |                                |                                                  |
| Eastern                                   | 7 (15%)                        | 17 (12%)                                         |
| London                                    | 1 (2%)                         | 21 (14%)                                         |
| North West                                | 11 (23%)                       | 23 (16%)                                         |
| Northern and Yorkshire                    | 7 (15%)                        | 17 (12%)                                         |
| South East                                | 8 (17%)                        | 22 (15%)                                         |
| South West                                | 4 (9%)                         | 17 (12%)                                         |
| Trent                                     | 4 (9%)                         | 12 (8%)                                          |
| West Midlands                             | 5 (11%)                        | 16 (11%)                                         |
| <b>Number of attendances 2014/15</b>      |                                |                                                  |
| 0-49,999                                  | 6 (13%)                        | 10 (7%)                                          |
| 50-99,999                                 | 20 (43%)                       | 65 (45%)                                         |
| 100-149,999                               | 18 (38%)                       | 53 (37%)                                         |
| 150-199,999                               | 1 (2%)                         | 9 (6%)                                           |
| 200-249,999                               | 1 (2%)                         | 6 (4%)                                           |
| 250,000+                                  | 1 (2%)                         | 2 (1%)                                           |
| <b>% Patients from urban areas</b>        |                                |                                                  |
| >= 0% and <25%                            | 0 (0%)                         | 0 (0%)                                           |
| >= 25% and <50%                           | 3 (6%)                         | 6 (4%)                                           |
| >=50% and <75%                            | 12 (26%)                       | 34 (23%)                                         |
| >= 75% and <=100%                         | 32 (68%)                       | 105 (72%)                                        |
| <b>Major Trauma Centre</b>                |                                |                                                  |
| Yes                                       | 7 (15%)                        | 28 (19%)                                         |
| No                                        | 40 (85%)                       | 117 (81%)                                        |
| <b>General &amp; Acute Beds Available</b> |                                |                                                  |
| Q4 2010-11                                | 31,728                         | 100,346                                          |
| Q4 2014-15                                | 32,167                         | 100,977                                          |
| % change                                  | 1.4%                           | 0.6%                                             |
| <b>General &amp; Acute Beds Occupied</b>  |                                |                                                  |
| Q4 2010-11                                | 27,836                         | 88,823                                           |
| Q4 2014-15                                | 29,009                         | 91,755                                           |
| % change                                  | 4.2%                           | 3.3%                                             |
