# Supplementary material for: Changes in admission thresholds in English emergency departments
Source: PubMed Central journal article supplement — Emerg Med J. 2017 Sep 12;34(12):773–9. doi: 10.1136/emermed-2016-206213 (PMC5750365; doi:10.1136/emermed-2016-206213), 2017-09-12
Supplement: emermed-2016-206213supp002.pdf [file emermed-2016-206213supp002.pdf]

**Appendix B**

**Table B1 – Diagnosis of Attendances**

|                                              | April 2010 -<br>Mar 2011 | Apr 2011 -<br>Mar 2012 | Apr 2012-<br>Mar 2013 | Apr 2013 -<br>Mar 2014 | Apr 2014 -<br>Mar 2015 |
|----------------------------------------------|--------------------------|------------------------|-----------------------|------------------------|------------------------|
| Respiratory conditions                       | 228,060                  | 209,706                | 243,539               | 227,679                | 250,073                |
| Laceration                                   | 239,932                  | 254,851                | 236,845               | 236,613                | 227,505                |
| Contusion/abrasion                           | 218,255                  | 214,203                | 198,409               | 193,414                | 194,593                |
| Soft tissue inflammation                     | 167,389                  | 169,623                | 169,581               | 168,044                | 170,343                |
| Head injury                                  | 128,029                  | 139,658                | 133,483               | 136,833                | 148,289                |
| Dislocation/fracture/joint injury/amputation | 342,621                  | 339,730                | 326,215               | 325,087                | 334,020                |
| Sprain/ligament injury                       | 313,369                  | 313,001                | 300,100               | 277,005                | 265,883                |
| Muscle/tendon injury                         | 108,232                  | 104,358                | 107,914               | 112,182                | 121,174                |
| Nerve injury                                 | 4,768                    | 13,679                 | 13,464                | 13,345                 | 13,582                 |
| Vascular injury                              | 4,034                    | 4,959                  | 5,255                 | 4,836                  | 4,406                  |
| Burns and scalds                             | 28,001                   | 27,553                 | 26,298                | 25,478                 | 26,070                 |
| Electric shock                               | 735                      | 7,472                  | 6,066                 | 6,030                  | 6,312                  |
| Foreign body                                 | 48,421                   | 55,291                 | 51,907                | 53,972                 | 55,115                 |
| Bites/stings                                 | 27,305                   | 26,791                 | 25,323                | 23,896                 | 22,133                 |
| Poisoning (inc overdose)                     | 63,820                   | 64,820                 | 64,724                | 69,696                 | 70,375                 |
| Near drowning                                | 203                      | 1,234                  | 1,084                 | 1,020                  | 977                    |
| Visceral injury                              | 741                      | 2,593                  | 2,418                 | 2,033                  | 2,375                  |
| Infectious disease                           | 36,744                   | 44,385                 | 54,928                | 51,756                 | 70,055                 |
| Local infection                              | 101,904                  | 98,754                 | 101,659               | 93,995                 | 89,665                 |
| Septicaemia                                  | 7,135                    | 11,451                 | 13,525                | 17,022                 | 27,200                 |
| Cardiac conditions                           | 191,025                  | 173,951                | 187,408               | 189,764                | 203,145                |
| Cerebro-vascular conditions                  | 54,459                   | 43,568                 | 48,979                | 45,607                 | 45,541                 |
| Other vascular conditions                    | 25,340                   | 26,963                 | 29,756                | 27,412                 | 25,243                 |
| Haematological conditions                    | 21,915                   | 11,687                 | 13,050                | 14,126                 | 17,294                 |
| Central nervous system conditions            | 111,225                  | 90,703                 | 98,035                | 99,418                 | 109,508                |
| Gastrointestinal conditions                  | 256,268                  | 273,987                | 298,372               | 294,793                | 306,463                |
| Urological conditions (inc cystitis)         | 99,761                   | 115,209                | 123,250               | 129,475                | 139,575                |
| Obstetric conditions                         | 16,070                   | 20,473                 | 21,291                | 20,426                 | 20,161                 |
| Gynaecological conditions                    | 55,764                   | 59,419                 | 60,067                | 59,602                 | 62,630                 |
| Diabetes & other endocrinological conditions | 20,901                   | 23,014                 | 25,884                | 24,313                 | 26,904                 |
| Dermatological conditions                    | 25,715                   | 27,677                 | 31,937                | 32,306                 | 33,953                 |
| Allergy (inc anaphylaxis)                    | 24,506                   | 25,319                 | 25,782                | 27,026                 | 28,018                 |
| Facio-maxillary conditions                   | 16,190                   | 16,748                 | 17,808                | 18,328                 | 18,178                 |
| ENT conditions                               | 72,519                   | 71,239                 | 80,490                | 79,399                 | 86,324                 |
| Psychiatric conditions                       | 39,155                   | 45,736                 | 49,202                | 53,961                 | 58,125                 |
| Ophthalmological conditions                  | 84,795                   | 90,782                 | 95,259                | 95,978                 | 100,467                |
| Social problems                              | 13,163                   | 12,178                 | 13,361                | 14,792                 | 16,149                 |
| Not classified                               | 579,102                  | 642,626                | 639,674               | 642,413                | 662,156                |
| Nothing abnormal detected                    | 113,386                  | 118,625                | 135,011               | 169,782                | 123,549                |

**Table B2 – Attendances Characteristics**

|                              |                       | April 2010 -<br>Mar 2011 | Apr 2011 -<br>Mar 2012 | Apr 2012-<br>Mar 2013 | Apr 2013 -<br>Mar 2014 | Apr 2014 -<br>Mar 2015 |
|------------------------------|-----------------------|--------------------------|------------------------|-----------------------|------------------------|------------------------|
| Arrival Mode                 | By ambulance          | 1,149,875                | 1,175,306              | 1,222,198             | 1,251,095              | 1,278,917              |
|                              | by other means        | 2,741,082                | 2,818,710              | 2,855,155             | 2,827,762              | 2,904,611              |
| Part of year                 | March - October       | 2,636,051                | 2,710,696              | 2,770,679             | 2,779,843              | 2,866,091              |
|                              | November - February   | 1,254,906                | 1,283,320              | 1,306,674             | 1,299,014              | 1,317,437              |
| Part of week                 | Monday - Friday       | 2,786,125                | 2,851,909              | 2,898,848             | 2,903,816              | 2,976,201              |
|                              | Saturday - Sunday     | 1,104,832                | 1,142,107              | 1,178,505             | 1,175,041              | 1,207,327              |
| Part of day                  | 8am-10pm              | 3,168,521                | 3,251,359              | 3,309,029             | 3,305,967              | 3,381,381              |
|                              | 10pm-8am              | 722,436                  | 742,657                | 768,324               | 772,890                | 802,147                |
| Prior Activity<br>(28 days)  | None                  | 3,510,789                | 3,606,913              | 3,672,305             | 3,668,607              | 3,752,387              |
|                              | Attended & admitted   | 144,832                  | 149,394                | 157,953               | 158,864                | 169,862                |
|                              | Attended not admitted | 235,336                  | 237,709                | 247,095               | 251,386                | 261,279                |
| Prior Activity<br>(365 days) | None                  | 2,573,787                | 2,593,619              | 2,622,933             | 2,610,377              | 2,661,484              |
|                              | Attended & admitted   | 554,654                  | 597,579                | 631,906               | 638,855                | 669,254                |
|                              | Attended not admitted | 762,516                  | 802,818                | 822,514               | 829,625                | 852,790                |
