# Supplementary material for: Changes in admission thresholds in English emergency departments
Source: PubMed Central journal article supplement — Emerg Med J. 2017 Sep 12;34(12):773–9. doi: 10.1136/emermed-2016-206213 (PMC5750365; doi:10.1136/emermed-2016-206213), 2017-09-12
Supplement: emermed-2016-206213supp003.pdf [file emermed-2016-206213supp003.pdf]

**Appendix C**

**Table C1 – Adjusted Odds of Admission by Patient Characteristics**

|                     |                            | Child Ambulance |             | Child Walk-in |             | Adult Ambulance |             | Adult Walk-in |             |
|---------------------|----------------------------|-----------------|-------------|---------------|-------------|-----------------|-------------|---------------|-------------|
|                     |                            | OR              | 95% CI      | OR            | 95% CI      | OR              | 95% CI      | OR            | 95% CI      |
| Intercept           |                            | 0.72            | (0.70-0.74) | 0.37          | (0.37-0.38) | 1.18            | (1.16-1.19) | 0.43          | (0.43-0.44) |
| Age                 | 0                          | 1.81            | (1.77-1.84) | 1.72          | (1.70-1.74) | -               |             | -             |             |
|                     | 1-4                        | 1.30            | (1.28-1.32) | 1.09          | (1.08-1.10) | -               |             | -             |             |
|                     | 5-12                       | 1.29            | (1.26-1.31) | 0.96          | (0.95-0.97) | -               |             | -             |             |
|                     | 13-17                      | 1.00            |             | 1.00          |             | -               |             | -             |             |
|                     | 18-34                      | -               |             | -             |             | 1.00            |             | 1.00          |             |
|                     | 35-54                      | -               |             | -             |             | 1.60            | (1.59-1.61) | 1.33          | (1.32-1.34) |
|                     | 55-74                      | -               |             | -             |             | 2.82            | (2.80-2.84) | 2.00          | (1.98-2.01) |
|                     | 75+                        | -               |             | -             |             | 4.37            | (4.34-4.40) | 2.86          | (2.85-2.88) |
| Gender              | Male                       | 1.00            |             | 1.00          |             | 1.00            |             | 1.00          |             |
|                     | Female                     | 0.97            | (0.96-0.98) | 0.98          | (0.97-0.98) | 0.90            | (0.90-0.91) | 0.99          | (0.98-0.99) |
| Deprivation (IMD04) | Quintile 1 (most deprived) | 1.00            |             | 1.00          |             | 1.00            |             | 1.00          |             |
|                     | Quintile 2                 | 1.03            | (1.01-1.04) | 1.04          | (1.03-1.05) | 1.02            | (1.02-1.03) | 1.06          | (1.05-1.06) |
|                     | Quintile 3                 | 1.04            | (1.02-1.06) | 1.06          | (1.05-1.07) | 1.06            | (1.05-1.06) | 1.09          | (1.08-1.09) |
|                     | Quintile 4                 | 1.04            | (1.03-1.06) | 1.05          | (1.04-1.06) | 1.06            | (1.06-1.07) | 1.09          | (1.08-1.10) |
|                     | Quintile 5                 | 1.01            | (1.00-1.03) | 1.06          | (1.05-1.07) | 1.05            | (1.05-1.06) | 1.08          | (1.08-1.09) |
| Ethnicity           | White                      | 1.00            |             | 1.00          |             | 1.00            |             | 1.00          |             |
|                     | Black                      | 1.10            | (1.07-1.12) | 0.97          | (0.96-0.99) | 0.80            | (0.79-0.81) | 0.81          | (0.80-0.81) |
|                     | Asian                      | 0.95            | (0.91-0.99) | 0.92          | (0.90-0.94) | 0.88            | (0.86-0.91) | 0.80          | (0.79-0.82) |
|                     | Mixed Parentage            | 0.99            | (0.95-1.03) | 0.98          | (0.96-1.00) | 0.94            | (0.90-0.97) | 0.85          | (0.82-0.87) |
|                     | Other                      | 0.88            | (0.86-0.89) | 0.84          | (0.83-0.85) | 0.82            | (0.82-0.83) | 0.76          | (0.75-0.76) |
|                     | Not stated / not known     | 0.91            | (0.87-0.94) | 0.83          | (0.81-0.84) | 0.79            | (0.77-0.80) | 0.69          | (0.68-0.70) |

**Table C2 – Adjusted Odds of Admission by Diagnosis**

|                                              | Child Ambulance |             | Child Walk-in |             | Adult Ambulance |             | Adult Walk-in |             |
|----------------------------------------------|-----------------|-------------|---------------|-------------|-----------------|-------------|---------------|-------------|
|                                              | OR              | 95% CI      | OR            | 95% CI      | OR              | 95% CI      | OR            | 95% CI      |
| Respiratory conditions                       | 1.00            |             | 1.00          |             | 1.00            |             | 1.00          |             |
| Laceration                                   | 0.18            | (0.17-0.19) | 0.09          | (0.09-0.09) | 0.10            | (0.10-0.10) | 0.06          | (0.06-0.06) |
| Contusion/abrasion                           | 0.15            | (0.14-0.15) | 0.04          | (0.04-0.04) | 0.10            | (0.10-0.10) | 0.02          | (0.02-0.02) |
| Soft tissue inflammation                     | 0.12            | (0.11-0.13) | 0.07          | (0.07-0.07) | 0.16            | (0.16-0.16) | 0.09          | (0.09-0.09) |
| Head injury                                  | 0.31            | (0.30-0.32) | 0.22          | (0.22-0.22) | 0.21            | (0.21-0.21) | 0.15          | (0.15-0.15) |
| Dislocation/fracture/joint injury/amputation | 1.00            | (0.97-1.03) | 0.24          | (0.23-0.24) | 0.65            | (0.64-0.65) | 0.15          | (0.15-0.15) |
| Sprain/ligament injury                       | 0.04            | (0.03-0.04) | 0.01          | (0.01-0.01) | 0.08            | (0.07-0.08) | 0.01          | (0.01-0.02) |
| Muscle/tendon injury                         | 0.10            | (0.09-0.11) | 0.05          | (0.05-0.05) | 0.10            | (0.09-0.10) | 0.05          | (0.05-0.05) |
| Nerve injury                                 | 1.28            | (1.08-1.51) | 0.20          | (0.19-0.22) | 0.43            | (0.41-0.45) | 0.17          | (0.16-0.17) |
| Vascular injury                              | 0.40            | (0.28-0.57) | 0.18          | (0.15-0.21) | 0.37            | (0.35-0.38) | 0.39          | (0.38-0.41) |
| Burns and scalds                             | 0.33            | (0.31-0.35) | 0.18          | (0.17-0.19) | 0.19            | (0.18-0.20) | 0.08          | (0.08-0.09) |
| Electric shock                               | 0.14            | (0.09-0.20) | 0.02          | (0.02-0.03) | 0.07            | (0.06-0.08) | 0.03          | (0.02-0.03) |
| Foreign body                                 | 0.26            | (0.24-0.29) | 0.18          | (0.17-0.18) | 0.22            | (0.21-0.23) | 0.10          | (0.10-0.10) |
| Bites/stings                                 | 0.31            | (0.28-0.36) | 0.13          | (0.12-0.14) | 0.12            | (0.11-0.13) | 0.07          | (0.07-0.08) |
| Poisoning (inc overdose)                     | 1.77            | (1.72-1.82) | 1.94          | (1.90-1.98) | 0.85            | (0.84-0.86) | 1.36          | (1.34-1.39) |
| Near drowning                                | 0.94            | (0.74-1.20) | 0.18          | (0.14-0.23) | 0.41            | (0.35-0.48) | 0.09          | (0.07-0.11) |
| Visceral injury                              | 1.60            | (1.24-2.07) | 0.35          | (0.31-0.41) | 1.67            | (1.51-1.84) | 0.48          | (0.45-0.52) |
| Infectious disease                           | 0.72            | (0.70-0.74) | 0.62          | (0.61-0.63) | 0.81            | (0.79-0.82) | 0.54          | (0.53-0.55) |
| Local infection                              | 0.60            | (0.57-0.62) | 0.53          | (0.52-0.54) | 0.85            | (0.84-0.87) | 0.48          | (0.47-0.48) |
| Septicaemia                                  | 3.82            | (3.38-4.31) | 2.39          | (2.25-2.53) | 10.1            | (9.6-10.6)  | 2.29          | (2.22-2.36) |
| Cardiac conditions                           | 0.55            | (0.52-0.58) | 0.55          | (0.53-0.57) | 0.96            | (0.95-0.97) | 1.55          | (1.53-1.56) |
| Cerebro-vascular conditions                  | 1.11            | (1.05-1.18) | 0.65          | (0.61-0.69) | 1.13            | (1.11-1.14) | 1.62          | (1.59-1.65) |
| Other vascular conditions                    | 0.67            | (0.57-0.78) | 0.58          | (0.54-0.64) | 0.58            | (0.57-0.59) | 0.57          | (0.56-0.58) |
| Haematological conditions                    | 1.66            | (1.45-1.90) | 1.78          | (1.68-1.88) | 1.21            | (1.17-1.25) | 1.13          | (1.10-1.15) |
| Central nervous system conditions            | 1.65            | (1.61-1.69) | 1.91          | (1.87-1.96) | 0.59            | (0.59-0.60) | 1.00          | (0.99-1.02) |
| Gastrointestinal conditions                  | 0.83            | (0.80-0.85) | 1.11          | (1.09-1.12) | 0.80            | (0.79-0.80) | 1.48          | (1.47-1.50) |
| Urological conditions (inc cystitis)         | 0.61            | (0.58-0.64) | 0.89          | (0.87-0.91) | 0.50            | (0.50-0.51) | 0.76          | (0.75-0.77) |
| Obstetric conditions                         | 1.56            | (1.35-1.79) | 1.79          | (1.68-1.90) | 1.28            | (1.23-1.32) | 2.05          | (2.01-2.08) |
| Gynaecological conditions                    | 1.07            | (0.98-1.16) | 1.13          | (1.08-1.18) | 1.12            | (1.10-1.15) | 1.20          | (1.18-1.21) |
| Diabetes& other endocrinological conditions  | 3.26            | (3.02-3.51) | 3.89          | (3.69-4.10) | 1.02            | (1.00-1.04) | 1.93          | (1.89-1.98) |
| Dermatological conditions                    | 0.55            | (0.51-0.59) | 0.40          | (0.39-0.41) | 0.38            | (0.36-0.39) | 0.19          | (0.19-0.20) |
| Allergy (inc anaphylaxis)                    | 0.52            | (0.49-0.55) | 0.36          | (0.35-0.37) | 0.23            | (0.23-0.24) | 0.22          | (0.21-0.22) |
| Facio-maxillary conditions                   | 0.36            | (0.31-0.41) | 0.33          | (0.31-0.35) | 0.25            | (0.23-0.26) | 0.21          | (0.21-0.22) |
| ENT conditions                               | 0.27            | (0.26-0.28) | 0.29          | (0.28-0.29) | 0.21            | (0.21-0.21) | 0.38          | (0.37-0.38) |
| Psychiatric conditions                       | 0.99            | (0.94-1.04) | 1.38          | (1.33-1.42) | 0.24            | (0.24-0.25) | 0.34          | (0.34-0.35) |
| Ophthalmological conditions                  | 0.12            | (0.10-0.15) | 0.10          | (0.09-0.10) | 0.08            | (0.07-0.08) | 0.02          | (0.02-0.02) |
| Social problems                              | 0.77            | (0.70-0.84) | 1.25          | (1.14-1.37) | 0.59            | (0.58-0.60) | 0.73          | (0.70-0.76) |
| Not classified                               | 1.05            | (1.03-1.07) | 0.95          | (0.94-0.96) | 0.59            | (0.58-0.59) | 0.56          | (0.56-0.57) |
| Nothing abnormal detected                    | 0.38            | (0.37-0.39) | 0.28          | (0.27-0.28) | 0.33            | (0.33-0.33) | 0.36          | (0.36-0.36) |

**Table C3 – Adjusted Odds of Admission by Attendance Characteristics**

|                           |                         | Child Ambulance |             | Child Walk-in |             | Adult Ambulance |             | Adult Walk-in |             |
|---------------------------|-------------------------|-----------------|-------------|---------------|-------------|-----------------|-------------|---------------|-------------|
|                           |                         | OR              | 95% CI      | OR            | 95% CI      | OR              | 95% CI      | OR            | 95% CI      |
| Year                      | April 2010 - March 2011 | 1.00            |             | 1.00          |             | 1.00            |             | 1.00          |             |
|                           | April 2011 - March 2012 | 0.97            | (0.95-0.99) | 0.86          | (0.85-0.87) | 0.93            | (0.92-0.93) | 0.93          | (0.92-0.94) |
|                           | April 2012 - March 2013 | 0.96            | (0.94-0.98) | 0.85          | (0.84-0.86) | 0.86            | (0.85-0.86) | 0.85          | (0.85-0.86) |
|                           | April 2013 - March 2014 | 0.91            | (0.89-0.92) | 0.83          | (0.82-0.84) | 0.82            | (0.82-0.83) | 0.81          | (0.80-0.81) |
|                           | April 2014 - March 2015 | 0.88            | (0.87-0.90) | 0.78          | (0.77-0.79) | 0.81            | (0.81-0.82) | 0.79          | (0.78-0.79) |
| Part of year              | March - October         | 1.00            |             | 1.00          |             | 1.00            |             | 1.00          |             |
|                           | November - February     | 0.91            | (0.90-0.92) | 0.94          | (0.93-0.95) | 0.98            | (0.98-0.99) | 0.98          | (0.98-0.98) |
| Part of week              | Monday - Friday         | 1.00            |             | 1.00          |             | 1.00            |             | 1.00          |             |
|                           | Saturday - Sunday       | 0.96            | (0.95-0.97) | 0.92          | (0.91-0.93) | 0.97            | (0.97-0.98) | 0.85          | (0.85-0.86) |
| Part of day               | 8am-10pm                | 1.00            |             | 1.00          |             | 1.00            |             | 1.00          |             |
|                           | 10pm-8am                | 0.78            | (0.77-0.79) | 1.10          | (1.09-1.11) | 0.96            | (0.95-0.96) | 1.02          | (1.02-1.03) |
| Prior Activity (28 days)  | None                    | 1.00            |             | 1.00          |             | 1.00            |             | 1.00          |             |
|                           | Attended and admitted   | 2.02            | (1.96-2.08) | 2.51          | (2.47-2.56) | 1.45            | (1.44-1.46) | 2.41          | (2.38-2.43) |
|                           | Attended not admitted   | 0.97            | (0.95-1.00) | 1.01          | (1.00-1.03) | 0.72            | (0.71-0.72) | 0.90          | (0.89-0.91) |
| Prior Activity (365 days) | None                    | 1.00            |             | 1.00          |             | 1.00            |             | 1.00          |             |
|                           | Attended and admitted   | 1.35            | (1.32-1.37) | 1.53          | (1.51-1.54) | 1.36            | (1.35-1.37) | 1.73          | (1.72-1.74) |
|                           | Attended not admitted   | 0.79            | (0.78-0.80) | 0.78          | (0.77-0.78) | 0.79            | (0.78-0.79) | 0.83          | (0.82-0.83) |

**Table C4 – Random Effects**

|                      | Child Ambulance | Child Walk-in | Adult Ambulance | Adult Walk in |
|----------------------|-----------------|---------------|-----------------|---------------|
|                      | Std. dev.       | Std. dev.     | Std. dev.       | Std. dev.     |
| Provider (intercept) | 0.49            | 0.47          | 0.33            | 0.40          |
