# Supplementary material for: Changes in admission thresholds in English emergency departments
Source: PubMed Central journal article supplement — Emerg Med J. 2017 Sep 12;34(12):773–9. doi: 10.1136/emermed-2016-206213 (PMC5750365; doi:10.1136/emermed-2016-206213), 2017-09-12
Supplement: emermed-2016-206213supp004.pdf [file emermed-2016-206213supp004.pdf]

## Appendix D

Effect sizes for Year shown as average Relative Risks and average Absolute Risk Reductions using method described by Grant<sup>22</sup>

| Model           | Year                          | Adjusted Odds ratio | 95% Conf. Interval | Average Relative Risk | Average Absolute Risk Reduction |
|-----------------|-------------------------------|---------------------|--------------------|-----------------------|---------------------------------|
| Child Ambulance | April 2010 - March 2011 (ref) | 1.000               | -                  | -                     | -                               |
|                 | April 2011 - March 2012       | 0.937               | (0.919 - 0.955)    | 0.957                 | 0.014                           |
|                 | April 2012 - March 2013       | 0.919               | (0.901 - 0.938)    | 0.945                 | 0.018                           |
|                 | April 2013 - March 2014       | 0.868               | (0.850 - 0.886)    | 0.908                 | 0.031                           |
|                 | April 2014 - March 2015       | 0.848               | (0.830 - 0.866)    | 0.893                 | 0.036                           |

|               |                               |       |                 |       |       |
|---------------|-------------------------------|-------|-----------------|-------|-------|
| Child Walk-in | April 2010 - March 2011 (ref) | 1.000 | -               | -     | -     |
|               | April 2011 - March 2012       | 0.862 | (0.853 - 0.871) | 0.877 | 0.016 |
|               | April 2012 - March 2013       | 0.849 | (0.839 - 0.858) | 0.865 | 0.017 |
|               | April 2013 - March 2014       | 0.821 | (0.812 - 0.831) | 0.840 | 0.021 |
|               | April 2014 - March 2015       | 0.774 | (0.765 - 0.783) | 0.797 | 0.026 |

|                 |                               |       |                 |       |       |
|-----------------|-------------------------------|-------|-----------------|-------|-------|
| Adult Ambulance | April 2010 - March 2011 (ref) | 1.000 | -               | -     | -     |
|                 | April 2011 - March 2012       | 0.919 | (0.913 - 0.925) | 0.964 | 0.021 |
|                 | April 2012 - March 2013       | 0.838 | (0.832 - 0.844) | 0.924 | 0.044 |
|                 | April 2013 - March 2014       | 0.806 | (0.800 - 0.811) | 0.907 | 0.053 |
|                 | April 2014 - March 2015       | 0.791 | (0.785 - 0.796) | 0.899 | 0.058 |

|               |                               |       |                 |       |       |
|---------------|-------------------------------|-------|-----------------|-------|-------|
| Adult Walk-in | April 2010 - March 2011 (ref) | 1.000 | -               | -     | -     |
|               | April 2011 - March 2012       | 0.918 | (0.912 - 0.923) | 0.930 | 0.011 |
|               | April 2012 - March 2013       | 0.837 | (0.832 - 0.843) | 0.86  | 0.023 |
|               | April 2013 - March 2014       | 0.791 | (0.786 - 0.797) | 0.819 | 0.029 |
|               | April 2014 - March 2015       | 0.771 | (0.765 - 0.776) | 0.800 | 0.032 |
